# Supplementary material for: Mixed micellization of dimeric surfactant–amphiphilic drug systems: effect of surfactant structure
Source: Royal Society of Chemistry journal article supplement (doi:10.1039/c5ra24058a), 2016-01-01
Supplement: c5ra24058a1.pdf [file c5ra24058a1.pdf]

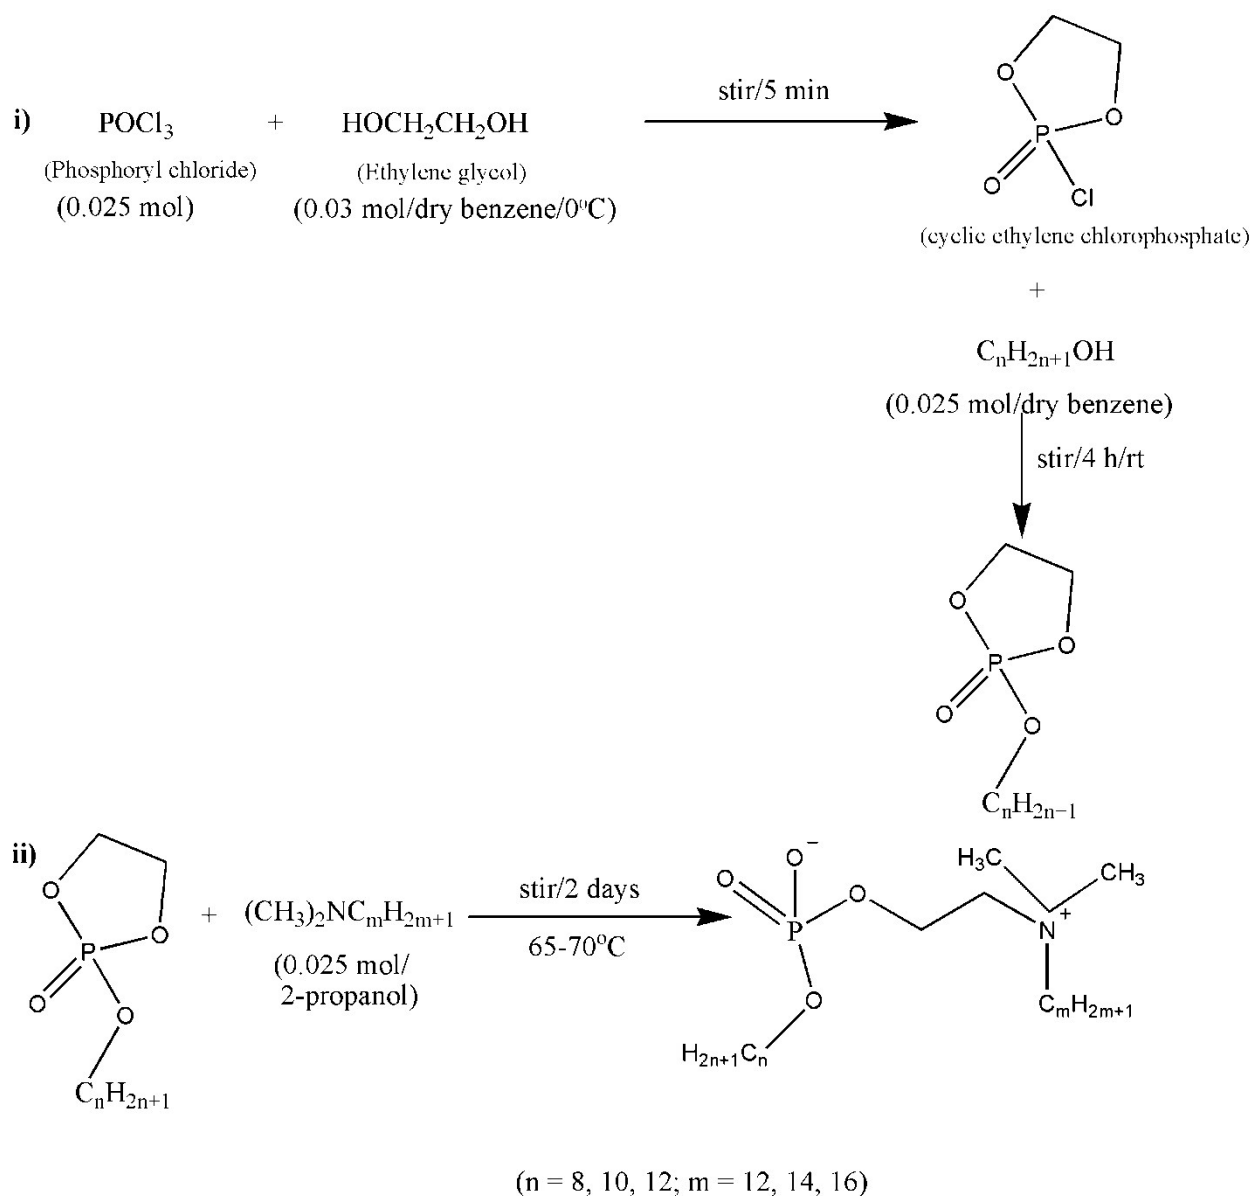

**Scheme S1.** The synthesis route for asymmetric zwitterionic dimeric surfactants.

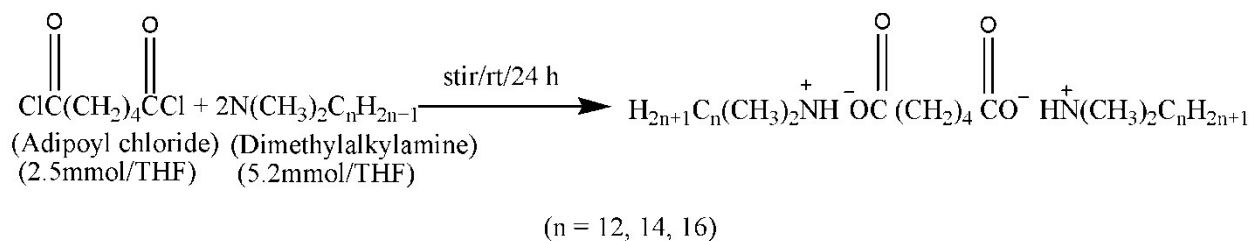

**Scheme S2.** The synthesis route for counterion coupled gemini surfactants.

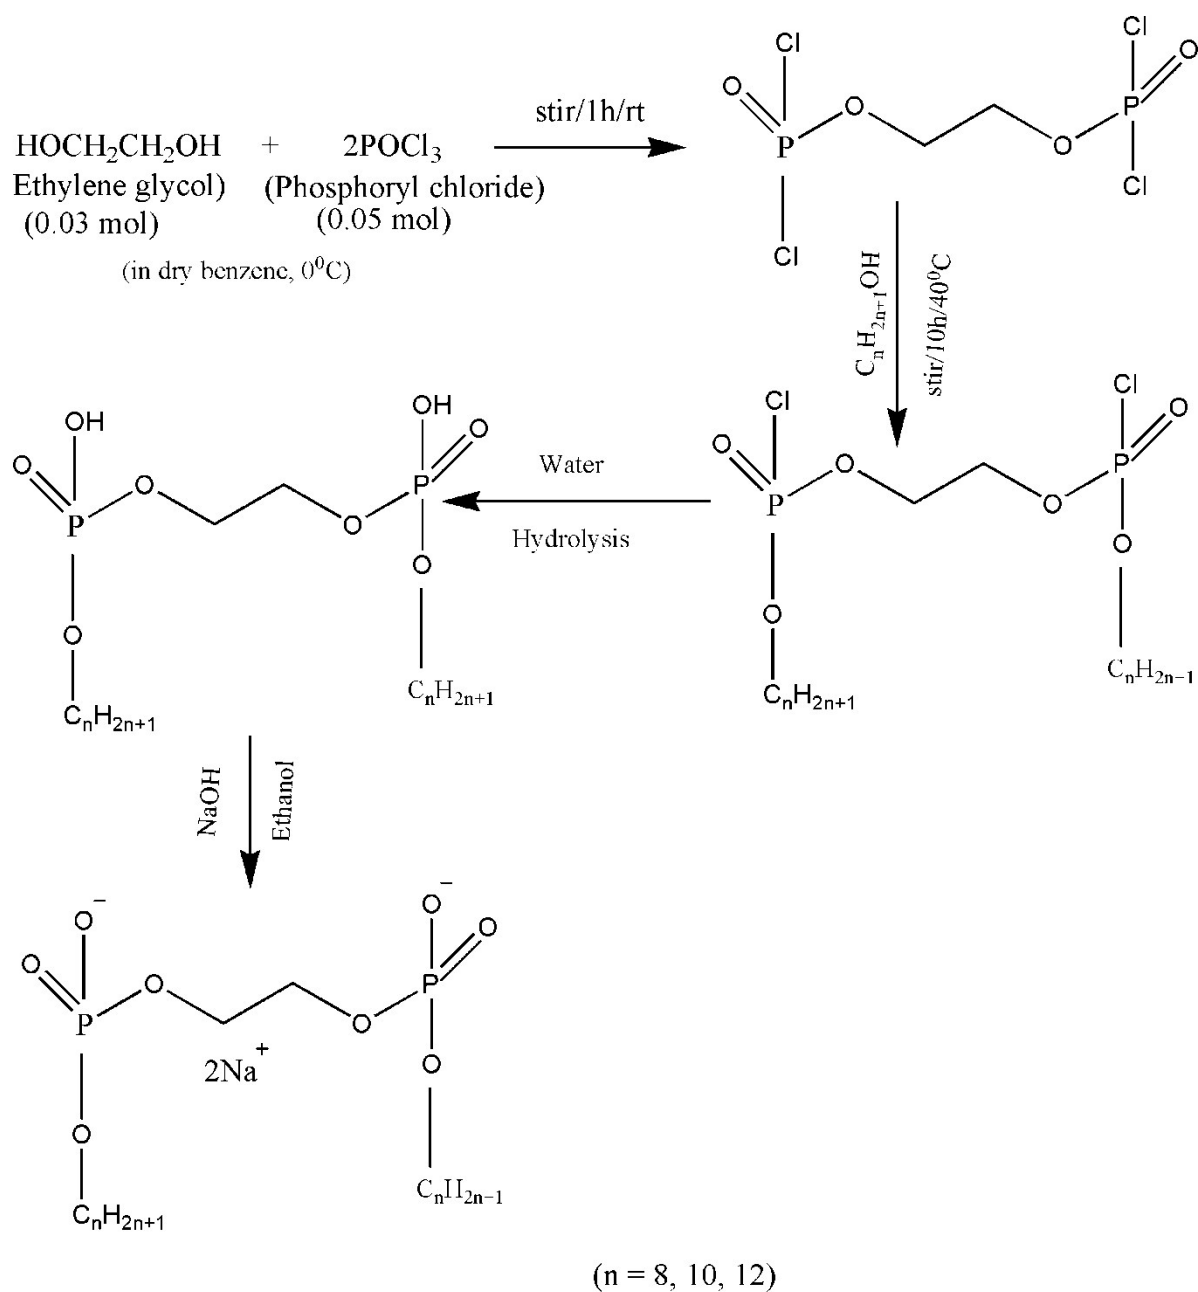

**Scheme S3.** The synthesis route for anionic dimeric surfactants.

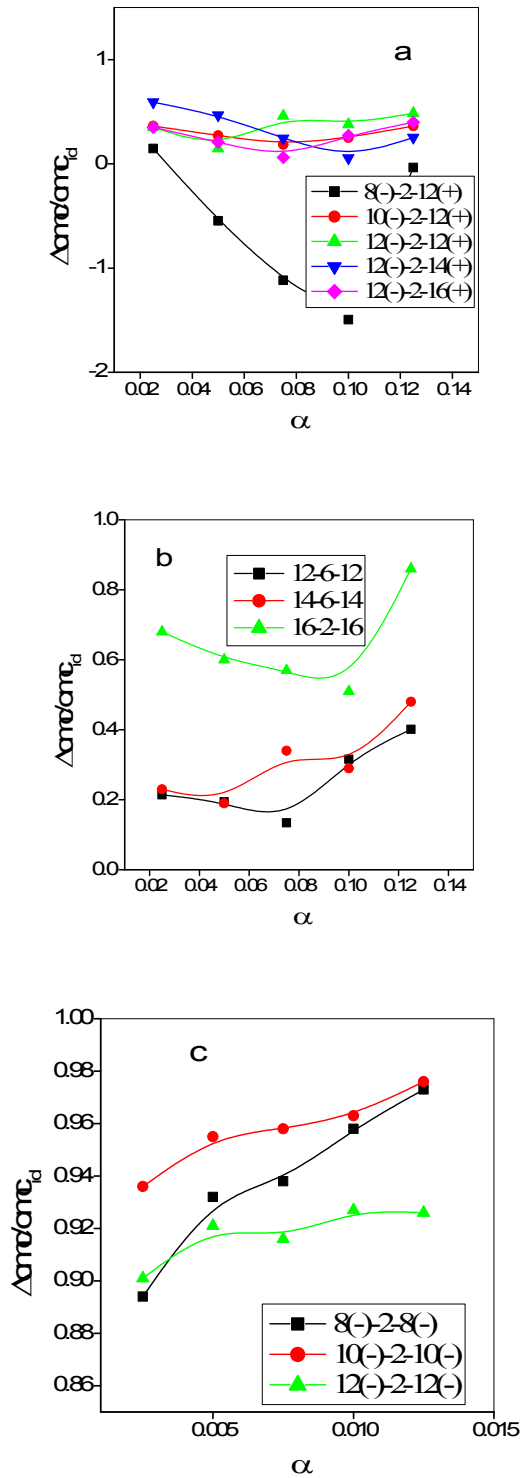

Fig. S1 Variation of equivalent deviation of cmc ( $\Delta\text{cmc}/\text{cmc}_{\text{id}}$ ) with the stoichiometric mole fraction ( $\alpha$ ) of zwitterionic dimers (a), cocogems (b) and anionic geminis (c) for the surfactant – IMP mixed systems.

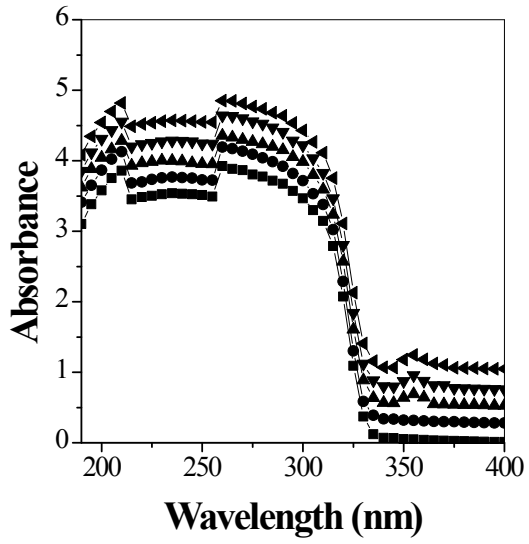

a

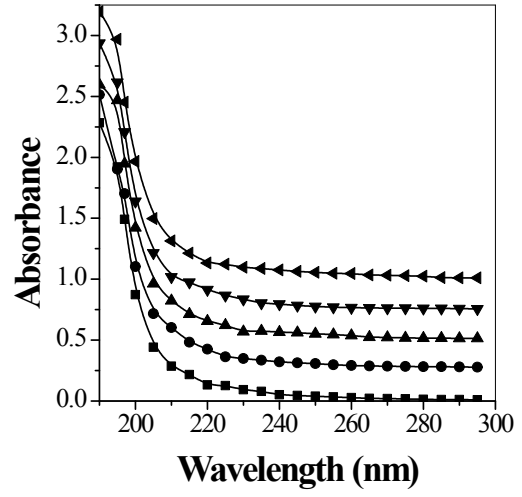

b

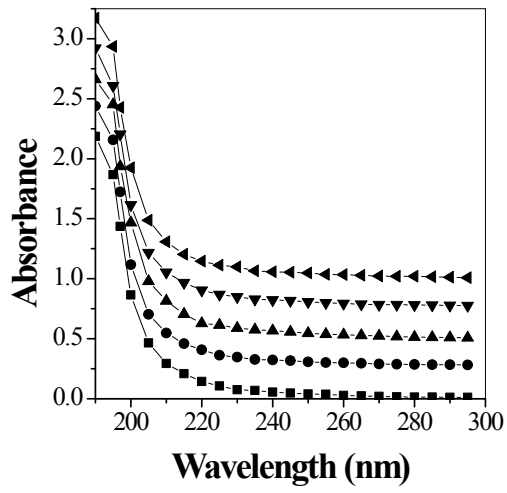

c

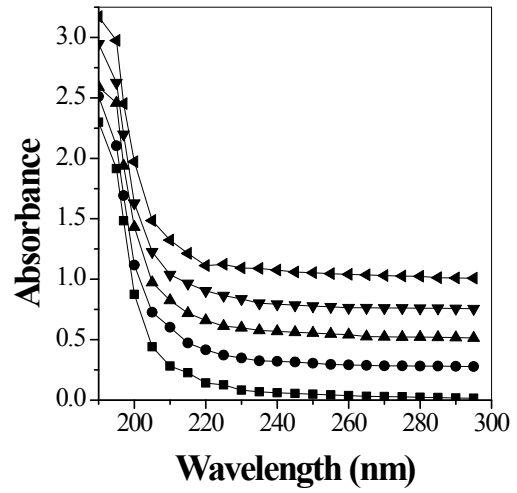

d

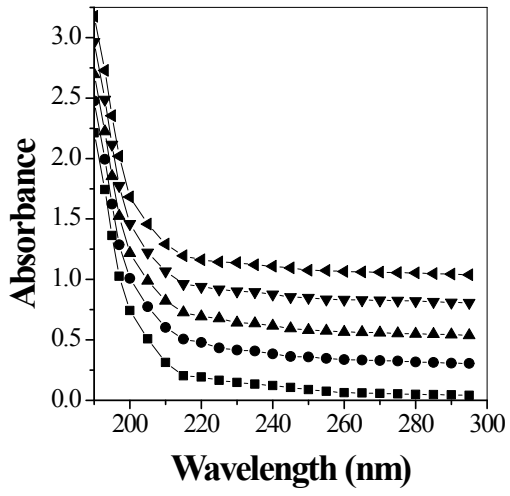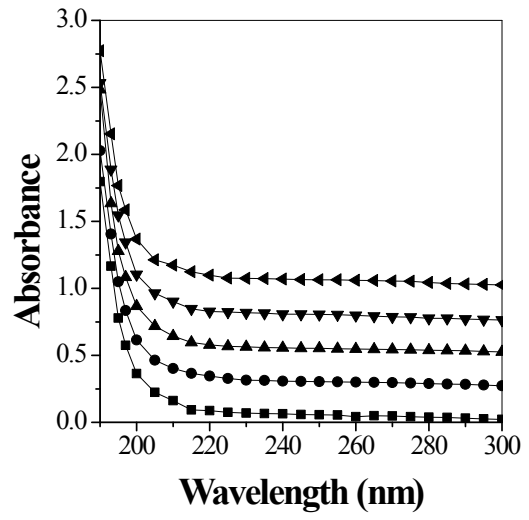

f

e

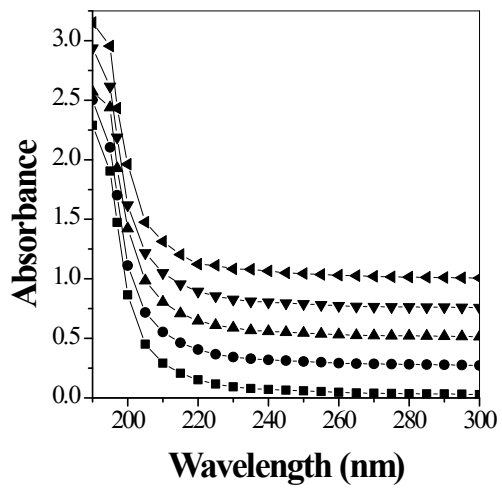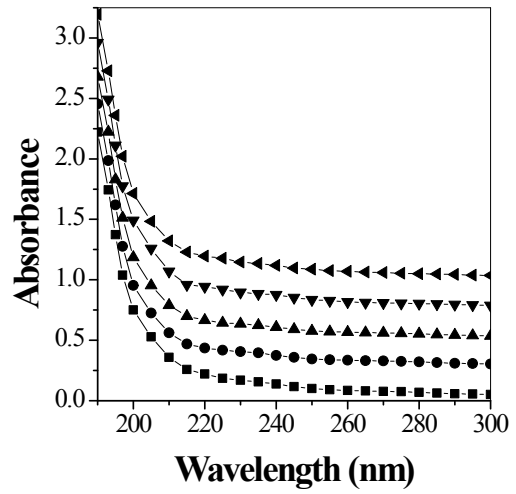

h

g

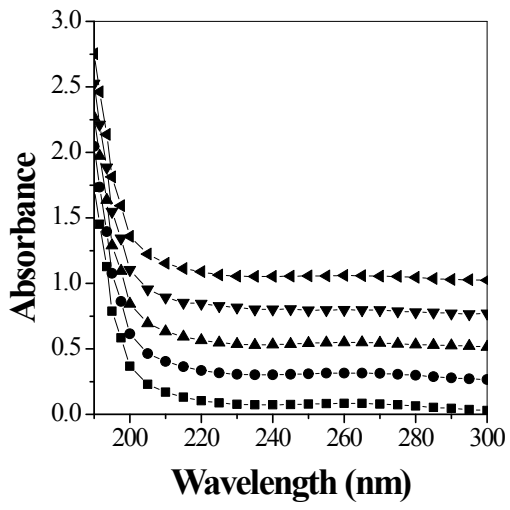

i

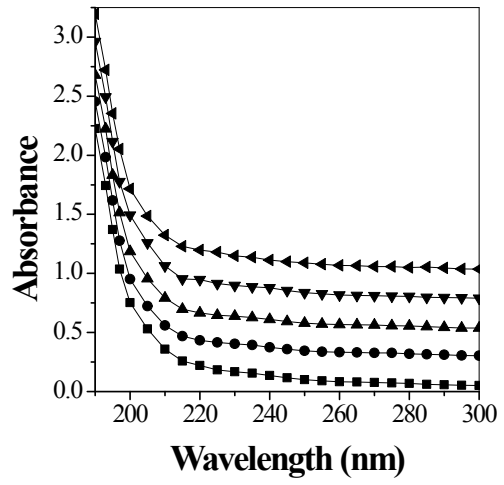

j

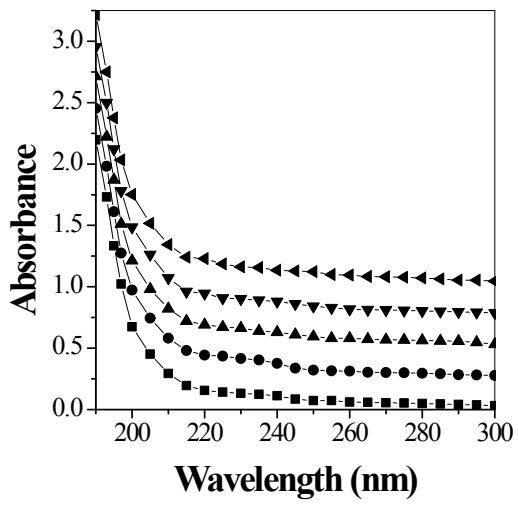

k

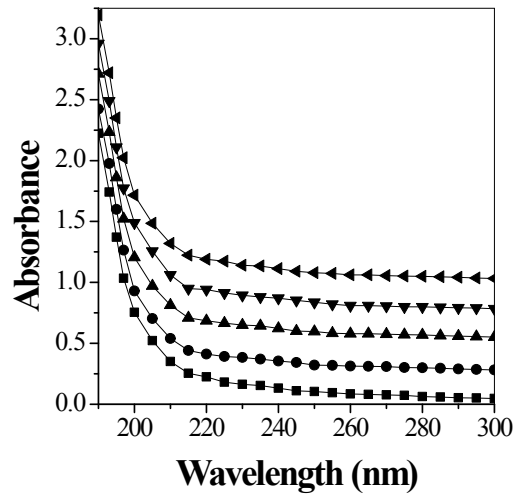

l

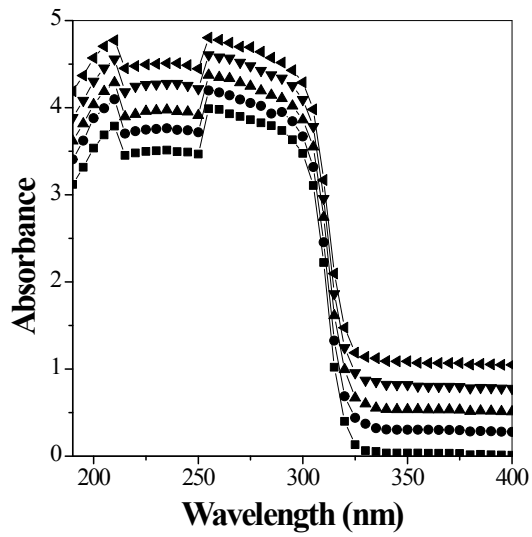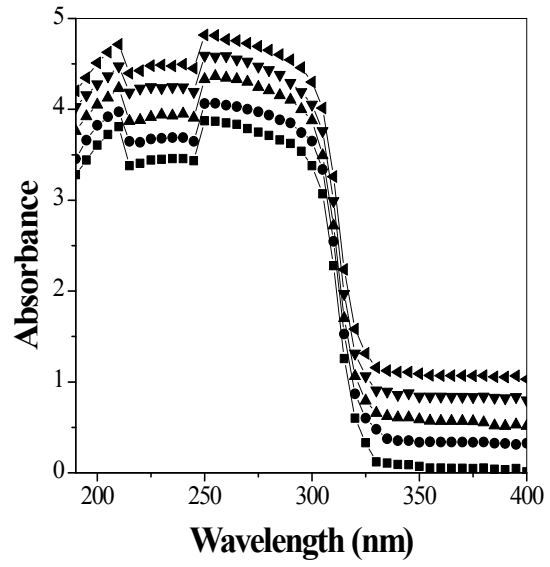

m

n

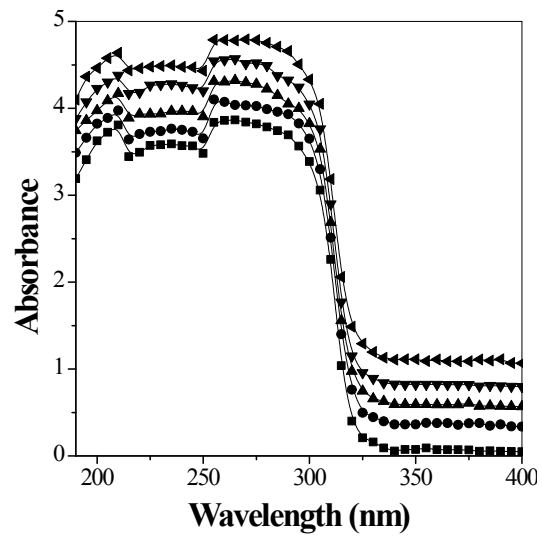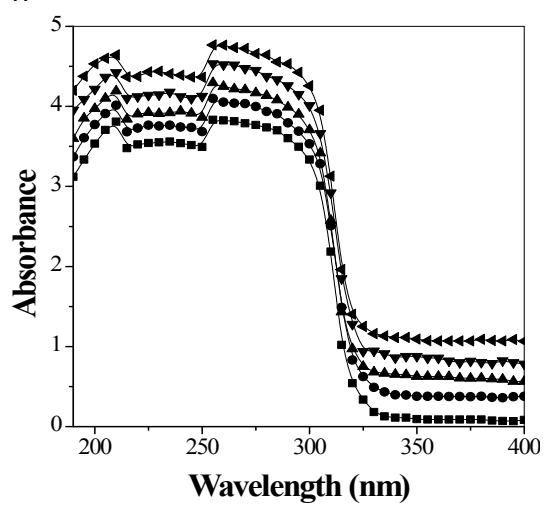

o

p

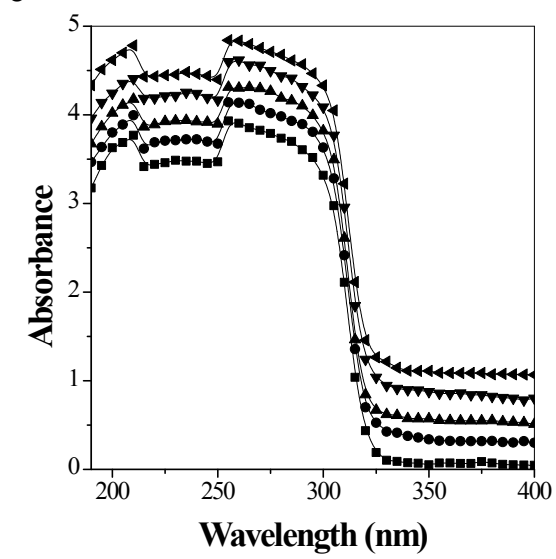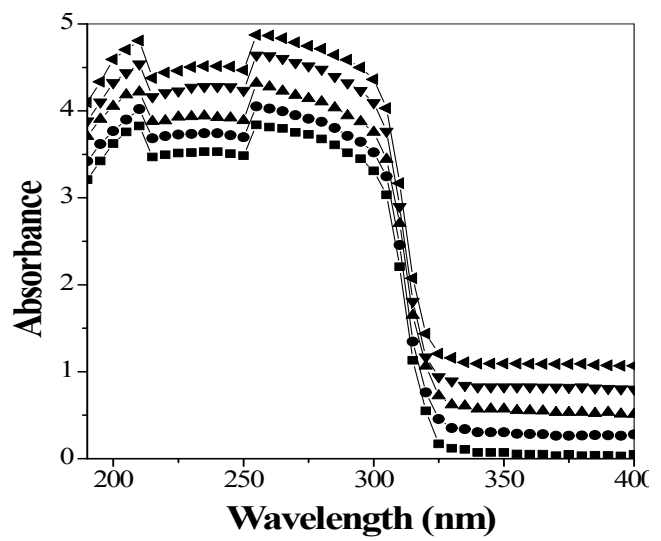

q

r



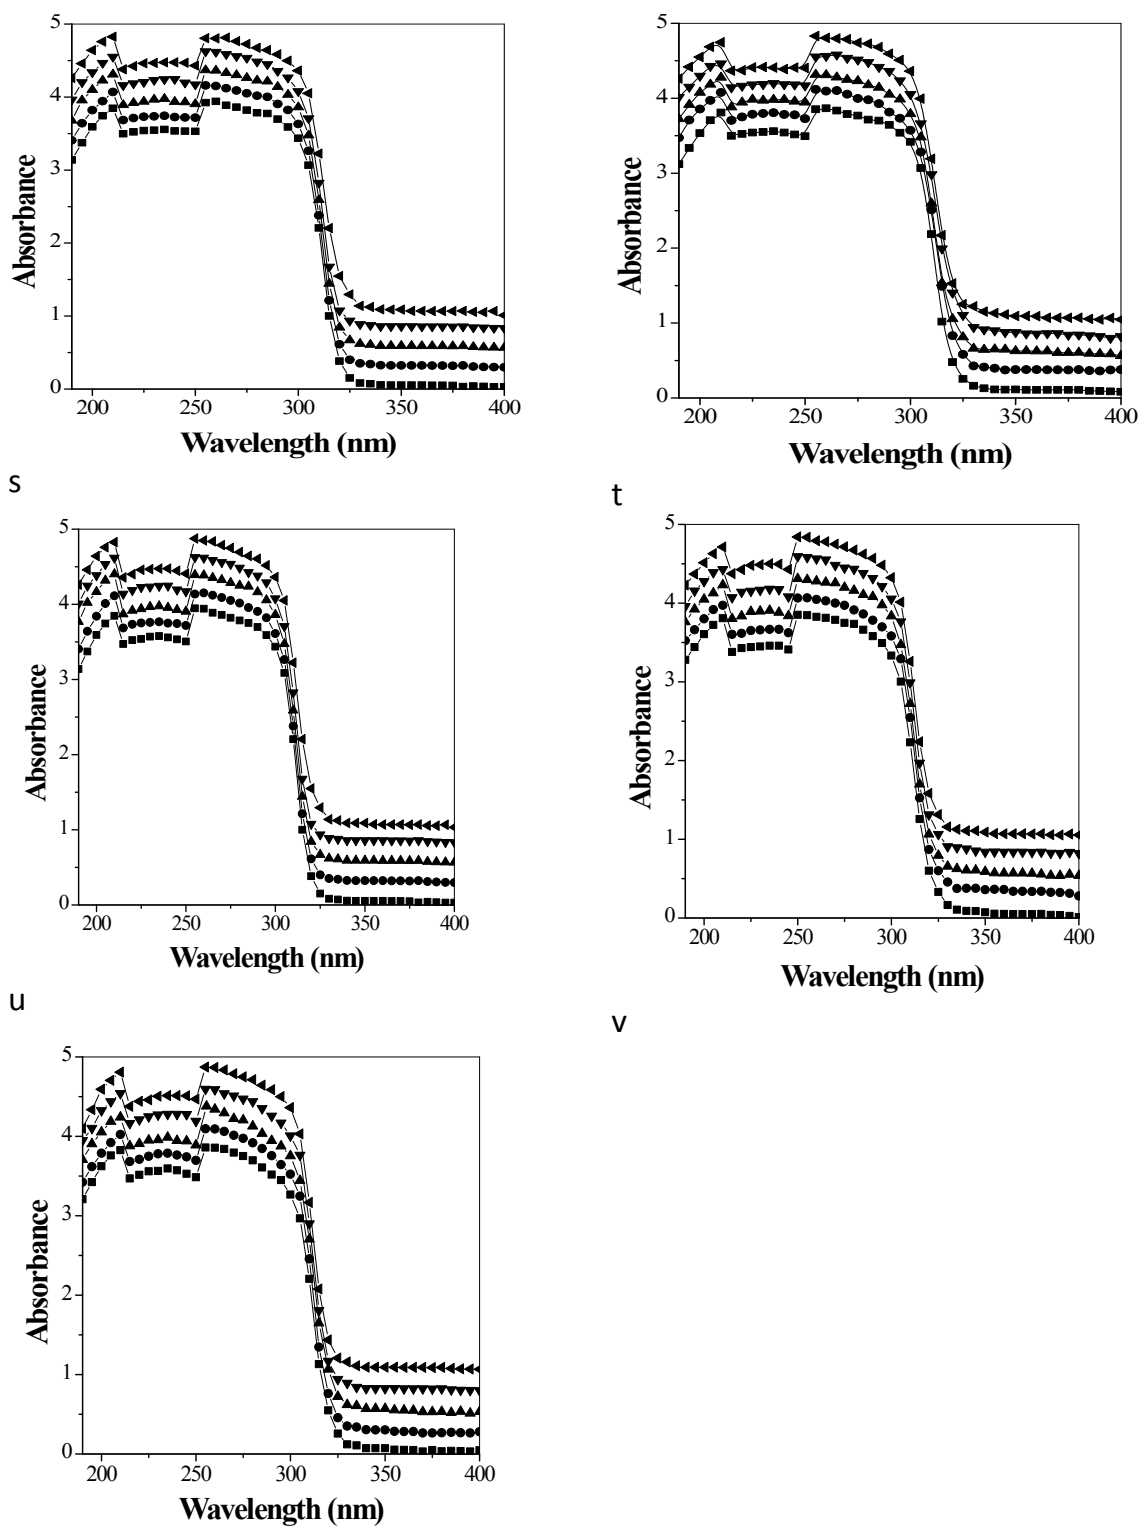

w

Fig S2: The UV-vis spectra of Sudan III in pure components (a-l) and in IMP-surfactant mixtures at  $\alpha = 0.075$  (for zwitterionic dimerics, m-q); (for cocogems, r-t) and  $\alpha = 0.0075$  (for anionic dimerics, u-w), just after preparation ( $\blacksquare$ ), 3 ( $\bullet$ ), 7 ( $\blacktriangle$ ), 15 ( $\blacktriangledown$ ) and 30 ( $\blacktriangleleft$ ) days. The y-axis scale is for plot denoted as ( $\blacksquare$ ). The other plots have been shifted vertically by 0.25, 0.5, 0.75 and 1, respectively. A is for IMP,
